# Supplementary material
Source: Springer Nature journal article supplement (https://www.springermedizin.de/resource/supplementary/12943_2013_1476_MOESM4_ESM.pdf/9552932)
Supplement: MOESM4 [file 9552932]

# A: Tumor volume

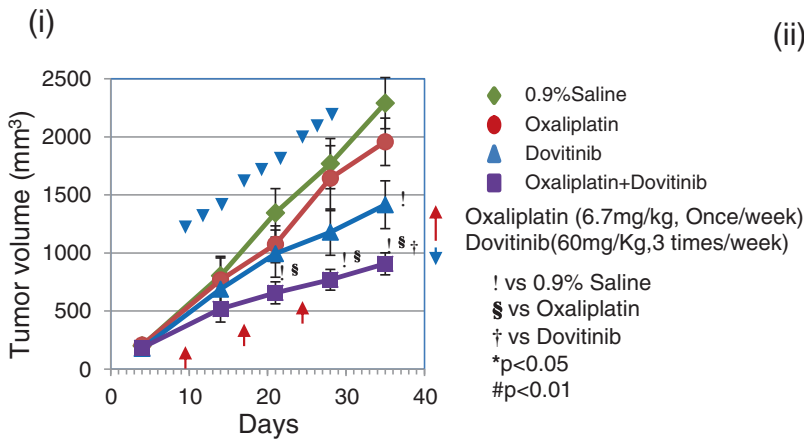

(ii)

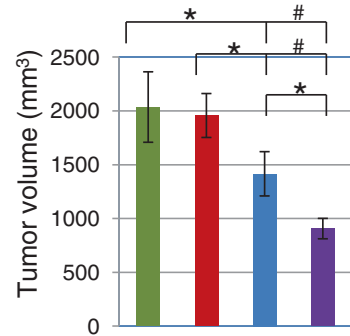

# B: Tumor Growth Delay in Treatment groups

| Groups                                    | Doubling Time (Days) | Time to predetermined tumor volume (1000mm <sup>3</sup> ) | Growth Delay (Days) |
|-------------------------------------------|----------------------|-----------------------------------------------------------|---------------------|
| 0.9% Saline (i.v.)                        | 13.57                | 4.63                                                      | -                   |
| Oxaliplatin (6.7mg/Kg/i.v. / once weekly) | 14.35                | 5.60                                                      | 0.97                |
| Dovitinib (60mg/Kg/oral/ 2days)           | 20.00                | 9.78                                                      | 5.15                |
| Oxaliplatin+Dovitinib                     | 25.21                | 23.84                                                     | 19.21               |

# C:IHC

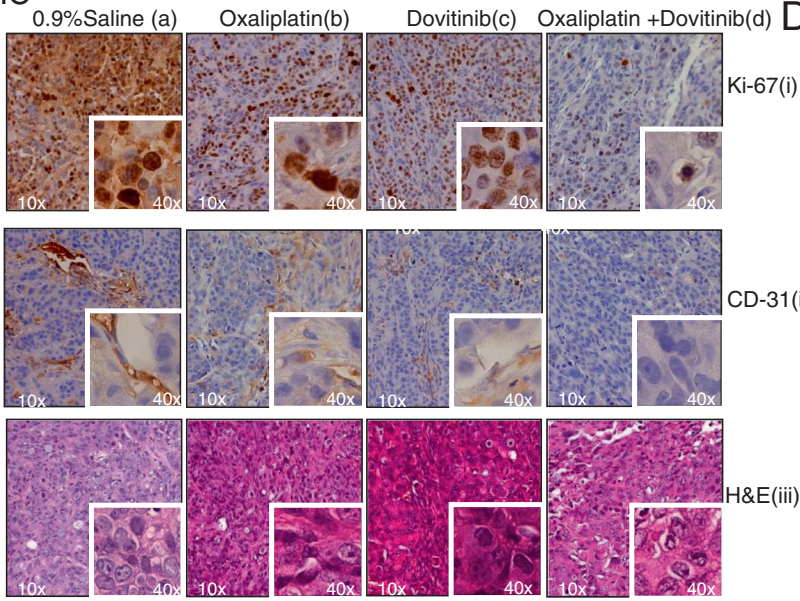

# D: Quantitative Staining

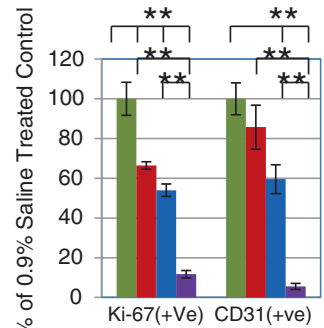

Legend:

- Untreated
- Oxaliplatin
- Dovitinib
- Oxaliplatin+Dovitinib
